# Supplementary material for: Zygosaccharomyces rouxii, an Aromatic Yeast Isolated From Chili Sauce, Is Able to Biosynthesize 2-Phenylethanol via the Shikimate or Ehrlich Pathways
Source: Front Microbiol. 2020 Oct 29;11:597454. doi: 10.3389/fmicb.2020.597454 (PMC7673420; doi:10.3389/fmicb.2020.597454)
Supplement: Supplementary file 3 [file Table_2.XLS]

## Sheet: Supplementary Table S2
Supplementary Table S2.The genes identified in strain M2013310 were functionally annotated using KOG function categories
Code	Description	Gene_num	Gene_list
O	Posttranslational modification, protein turnover, chaperones	702	g7638.t1;g8684.t1;g4822.t1;g2672.t1;g4025.t1;g948.t1;g2204.t1;g4068.t1;g2068.t1;g4942.t1;g177.t1;g6918.t1;g6183.t1;g7238.t1;g6825.t1;g2154.t1;g4316.t1;g2698.t1;g5946.t1;g5692.t1;g202.t1;g5763.t1;g2540.t1;g7730.t1;g3773.t1;g6333.t1;g7157.t1;g5032.t1;g3634.t1;g5318.t1;g3943.t1;g7865.t1;g5724.t1;g8804.t1;g7212.t1;g7935.t1;g7043.t1;g80.t1;g1584.t1;g2775.t1;g1549.t1;g4589.t1;g6083.t1;g4749.t1;g4188.t1…
C	Energy production and conversion	355	g4975.t1;g7167.t1;g7754.t1;g6972.t1;g3663.t1;g2764.t1;g8844.t1;g8789.t1;g4869.t1;g2362.t1;g5733.t1;g1926.t1;g8523.t1;g5724.t1;g4853.t1;g1801.t1;g6884.t1;g9018.t1;g2482.t1;g5092.t1;g7401.t1;g2584.t1;g4763.t1;g4139.t1;g7821.t1;g3759.t1;g6472.t1;g6355.t1;g3215.t1;g5803.t1;g2964.t1;g668.t1;g2580.t1;g1432.t1;g6544.t1;g5711.t1;g5479.t1;g599.t1;g3696.t1;g3689.t1;g2559.t1;g1354.t1;g5667.t1;g4288.t1;g7128…
H	Coenzyme transport and metabolism	141	g7020.t1;g8904.t1;g5003.t1;g6972.t1;g6900.t1;g8907.t1;g424.t1;g4383.t1;g2764.t1;g2515.t1;g8650.t1;g1139.t1;g7797.t1;g8961.t1;g8445.t1;g4575.t1;g5265.t1;g6544.t1;g469.t1;g2061.t1;g4528.t1;g843.t1;g5445.t1;g6097.t1;g8671.t1;g6275.t1;g7524.t1;g6054.t1;g3556.t1;g3125.t1;g3980.t1;g684.t1;g8831.t1;g1951.t1;g1852.t1;g8900.t1;g7228.t1;g1908.t1;g3511.t1;g940.t1;g1400.t1;g1122.t1;g4113.t1;g956.t1;g5160.t1;…
A	RNA processing and modification	375	g700.t1;g1705.t1;g2425.t1;g3908.t1;g6614.t1;g7940.t1;g8263.t1;g8972.t1;g5342.t1;g1511.t1;g4542.t1;g3621.t1;g5815.t1;g3304.t1;g4043.t1;g4222.t1;g7674.t1;g5595.t1;g7105.t1;g7358.t1;g1277.t1;g2819.t1;g8146.t1;g5883.t1;g1039.t1;g7858.t1;g4841.t1;g2192.t1;g7494.t1;g7517.t1;g1349.t1;g3283.t1;g2921.t1;g20.t1;g8708.t1;g7271.t1;g6270.t1;g6448.t1;g8602.t1;g6679.t1;g4798.t1;g6946.t1;g3714.t1;g5222.t1;g7706.…
G	Carbohydrate transport and metabolism	242	g8726.t1;g862.t1;g2740.t1;g6025.t1;g2794.t1;g3797.t1;g5763.t1;g6184.t1;g3860.t1;g2391.t1;g1667.t1;g8266.t1;g8832.t1;g4870.t1;g2081.t1;g8594.t1;g5908.t1;g9011.t1;g2247.t1;g6526.t1;g3081.t1;g7165.t1;g3979.t1;g6571.t1;g8223.t1;g5474.t1;g4220.t1;g5772.t1;g7164.t1;g5944.t1;g2421.t1;g2329.t1;g2433.t1;g3762.t1;g1335.t1;g404.t1;g7493.t1;g1152.t1;g7946.t1;g4694.t1;g7735.t1;g6397.t1;g5776.t1;g346.t1;g5537.…
Z	Cytoskeleton	193	g5951.t1;g5079.t1;g7239.t1;g1960.t1;g2737.t1;g25.t1;g3118.t1;g8380.t1;g7150.t1;g1554.t1;g8.t1;g3746.t1;g379.t1;g3089.t1;g2390.t1;g5900.t1;g2123.t1;g7456.t1;g5062.t1;g2054.t1;g6792.t1;g8836.t1;g6987.t1;g6874.t1;g7345.t1;g2791.t1;g5221.t1;g6567.t1;g3596.t1;g3639.t1;g6691.t1;g3238.t1;g2924.t1;g2664.t1;g8876.t1;g4189.t1;g4437.t1;g3936.t1;g2103.t1;g3541.t1;g7757.t1;g2046.t1;g2939.t1;g6551.t1;g6500.t1;…
J	Translation, ribosomal structure and biogenesis	558	g700.t1;g4934.t1;g2823.t1;g5978.t1;g2379.t1;g8168.t1;g2772.t1;g696.t1;g3658.t1;g3532.t1;g8473.t1;g1057.t1;g7252.t1;g3009.t1;g2818.t1;g2462.t1;g2590.t1;g6814.t1;g2901.t1;g6599.t1;g981.t1;g1465.t1;g5815.t1;g3985.t1;g6672.t1;g6353.t1;g1021.t1;g8775.t1;g1776.t1;g1774.t1;g7043.t1;g4779.t1;g3867.t1;g2824.t1;g5302.t1;g7308.t1;g209.t1;g8968.t1;g8431.t1;g6120.t1;g77.t1;g8622.t1;g8946.t1;g5198.t1;g9028.t1;…
I	Lipid transport and metabolism	242	g763.t1;g9003.t1;g8628.t1;g4390.t1;g3228.t1;g7302.t1;g7755.t1;g580.t1;g2349.t1;g5927.t1;g5081.t1;g2191.t1;g3466.t1;g5293.t1;g1898.t1;g5676.t1;g3215.t1;g406.t1;g2841.t1;g3472.t1;g4608.t1;g5189.t1;g3947.t1;g3168.t1;g2654.t1;g7606.t1;g971.t1;g8106.t1;g8532.t1;g2261.t1;g8465.t1;g1703.t1;g3595.t1;g4565.t1;g615.t1;g391.t1;g4591.t1;g85.t1;g8337.t1;g718.t1;g775.t1;g3326.t1;g2945.t1;g8108.t1;g1925.t1;g430…
Y	Nuclear structure	63	g2769.t1;g6530.t1;g998.t1;g7956.t1;g4345.t1;g6266.t1;g559.t1;g4264.t1;g5067.t1;g3423.t1;g54.t1;g5812.t1;g3826.t1;g4223.t1;g5773.t1;g6072.t1;g5321.t1;g1562.t1;g5795.t1;g1080.t1;g9002.t1;g2502.t1;g8692.t1;g1681.t1;g5400.t1;g2288.t1;g340.t1;g4955.t1;g2313.t1;g3849.t1;g8591.t1;g4044.t1;g8769.t1;g3625.t1;g4120.t1;g2374.t1;g6141.t1;g3588.t1;g8245.t1;g8985.t1;g1263.t1;g6069.t1;g8320.t1;g3649.t1;g8963.t1…
E	Amino acid transport and metabolism	375	g8168.t1;g4547.t1;g8058.t1;g8977.t1;g4383.t1;g8589.t1;g5116.t1;g4537.t1;g6333.t1;g4985.t1;g8359.t1;g70.t1;g8309.t1;g5878.t1;g8917.t1;g4187.t1;g3237.t1;g1020.t1;g5694.t1;g7033.t1;g1524.t1;g4773.t1;g2111.t1;g4761.t1;g3365.t1;g5455.t1;g939.t1;g6749.t1;g5494.t1;g8239.t1;g469.t1;g3651.t1;g5903.t1;g711.t1;g5741.t1;g843.t1;g5702.t1;g7893.t1;g3430.t1;g6876.t1;g8830.t1;g6995.t1;g6063.t1;g6100.t1;g2995.t1;…
Q	Secondary metabolites biosynthesis, transport and catabolism	114	g3688.t1;g4276.t1;g757.t1;g4319.t1;g5300.t1;g3215.t1;g805.t1;g2269.t1;g5699.t1;g807.t1;g2654.t1;g7930.t1;g969.t1;g1713.t1;g8113.t1;g4771.t1;g3206.t1;g1054.t1;g5747.t1;g122.t1;g979.t1;g7378.t1;g7377.t1;g6603.t1;g4811.t1;g4446.t1;g8108.t1;g2337.t1;g7376.t1;g7130.t1;g8085.t1;g4688.t1;g5671.t1;g6415.t1;g4649.t1;g1779.t1;g598.t1;g4964.t1;g4629.t1;g1757.t1;g4687.t1;g6140.t1;g5121.t1;g442.t1;g5376.t1;g5…
W	Extracellular structures	10	g5366.t1;g5203.t1;g276.t1;g1570.t1;g3035.t1;g8312.t1;g877.t1;g6803.t1;g3358.t1;g1043.t1;
M	Cell wall/membrane/envelope biogenesis	74	g7264.t1;g8335.t1;g3816.t1;g5763.t1;g1252.t1;g8645.t1;g7586.t1;g550.t1;g6654.t1;g7165.t1;g4165.t1;g6634.t1;g7442.t1;g1803.t1;g2464.t1;g4960.t1;g7946.t1;g4228.t1;g7329.t1;g2139.t1;g1547.t1;g6228.t1;g6428.t1;g8586.t1;g5570.t1;g4160.t1;g802.t1;g4817.t1;g5118.t1;g276.t1;g3640.t1;g8793.t1;g2729.t1;g3902.t1;g2872.t1;g8249.t1;g7787.t1;g2094.t1;g3913.t1;g8779.t1;g4756.t1;g4167.t1;g8911.t1;g2731.t1;g2667.…
F	Nucleotide transport and metabolism	135	g1651.t1;g6429.t1;g6259.t1;g4349.t1;g4961.t1;g2141.t1;g850.t1;g8650.t1;g3237.t1;g325.t1;g4809.t1;g81.t1;g2177.t1;g2294.t1;g8939.t1;g74.t1;g6097.t1;g1685.t1;g481.t1;g7986.t1;g1852.t1;g7871.t1;g8738.t1;g3577.t1;g6751.t1;g1400.t1;g5210.t1;g4964.t1;g1396.t1;g206.t1;g4074.t1;g8861.t1;g4840.t1;g5551.t1;g5010.t1;g2114.t1;g5245.t1;g5190.t1;g6660.t1;g865.t1;g3407.t1;g750.t1;g5573.t1;g2687.t1;g1904.t1;g416…
D	Cell cycle control, cell division, chromosome partitioning	310	g8378.t1;g5951.t1;g1956.t1;g8424.t1;g5079.t1;g3032.t1;g5624.t1;g5794.t1;g2202.t1;g7239.t1;g2737.t1;g5529.t1;g4900.t1;g3118.t1;g3121.t1;g847.t1;g3641.t1;g1500.t1;g4865.t1;g3400.t1;g5139.t1;g4117.t1;g62.t1;g3746.t1;g6164.t1;g2237.t1;g5484.t1;g8139.t1;g491.t1;g6159.t1;g7274.t1;g1075.t1;g3031.t1;g2146.t1;g7025.t1;g8156.t1;g5164.t1;g8137.t1;g318.t1;g8934.t1;g6589.t1;g7141.t1;g6388.t1;g6781.t1;g8449.t1…
B	Chromatin structure and dynamics	158	g8416.t1;g6762.t1;g3032.t1;g1144.t1;g5626.t1;g6242.t1;g1933.t1;g3781.t1;g4599.t1;g5433.t1;g5627.t1;g2202.t1;g2680.t1;g1911.t1;g361.t1;g1109.t1;g927.t1;g4865.t1;g30.t1;g2106.t1;g6720.t1;g613.t1;g1112.t1;g2871.t1;g96.t1;g8664.t1;g3179.t1;g8941.t1;g7274.t1;g7706.t1;g4364.t1;g477.t1;g1698.t1;g1675.t1;g4486.t1;g3703.t1;g2485.t1;g2616.t1;g8851.t1;g7438.t1;g1918.t1;g565.t1;g7658.t1;g2994.t1;g2978.t1;g40…
R	General function prediction only	869	g625.t1;g2300.t1;g4009.t1;g3583.t1;g6021.t1;g1785.t1;g2753.t1;g316.t1;g8424.t1;g2695.t1;g4202.t1;g3385.t1;g3598.t1;g2154.t1;g8752.t1;g3982.t1;g4242.t1;g7888.t1;g1990.t1;g6487.t1;g3270.t1;g1307.t1;g7311.t1;g7816.t1;g2244.t1;g3682.t1;g810.t1;g5087.t1;g1367.t1;g8538.t1;g5469.t1;g2365.t1;g3116.t1;g732.t1;g390.t1;g4513.t1;g3512.t1;g6095.t1;g2630.t1;g396.t1;g4695.t1;g4405.t1;g4993.t1;g186.t1;g5051.t1;g…
L	Replication, recombination and repair	309	g432.t1;g3032.t1;g4958.t1;g5794.t1;g5433.t1;g297.t1;g4017.t1;g7952.t1;g5581.t1;g2499.t1;g1109.t1;g6694.t1;g6323.t1;g3641.t1;g4281.t1;g6674.t1;g5139.t1;g8598.t1;g7614.t1;g6556.t1;g6164.t1;g7830.t1;g3965.t1;g6049.t1;g96.t1;g205.t1;g4585.t1;g4493.t1;g6018.t1;g3179.t1;g5358.t1;g1264.t1;g5038.t1;g7609.t1;g8727.t1;g2571.t1;g8689.t1;g5849.t1;g2558.t1;g6589.t1;g8834.t1;g5798.t1;g2927.t1;g4782.t1;g8029.t1…
U	Intracellular trafficking, secretion, and vesicular transport	540	g625.t1;g4387.t1;g2672.t1;g1351.t1;g3107.t1;g5079.t1;g1362.t1;g4316.t1;g8238.t1;g5146.t1;g2362.t1;g3040.t1;g4122.t1;g720.t1;g7791.t1;g2737.t1;g2482.t1;g3240.t1;g4900.t1;g8571.t1;g998.t1;g7956.t1;g4871.t1;g627.t1;g7047.t1;g6817.t1;g4800.t1;g4345.t1;g4911.t1;g826.t1;g6776.t1;g3746.t1;g8302.t1;g2217.t1;g2237.t1;g7854.t1;g7554.t1;g4577.t1;g2968.t1;g1257.t1;g89.t1;g6266.t1;g8479.t1;g811.t1;g3396.t1;g3…
K	Transcription	450	g4986.t1;g2619.t1;g5163.t1;g5663.t1;g6027.t1;g4657.t1;g8423.t1;g1144.t1;g4348.t1;g7381.t1;g7987.t1;g5624.t1;g5227.t1;g6380.t1;g5852.t1;g3781.t1;g6640.t1;g4459.t1;g8087.t1;g2175.t1;g3306.t1;g7383.t1;g770.t1;g8204.t1;g4971.t1;g3525.t1;g7693.t1;g1928.t1;g3698.t1;g2003.t1;g608.t1;g5581.t1;g5284.t1;g5697.t1;g361.t1;g6389.t1;g2661.t1;g2898.t1;g2170.t1;g7489.t1;g927.t1;g5589.t1;g2893.t1;g1692.t1;g4281.t…
N	Cell motility	2	g4023.t1;g8790.t1;
P	Inorganic ion transport and metabolism	173	g4297.t1;g6463.t1;g3415.t1;g2154.t1;g216.t1;g8441.t1;g1087.t1;g2700.t1;g7132.t1;g4484.t1;g5488.t1;g3121.t1;g7563.t1;g648.t1;g2009.t1;g4805.t1;g1090.t1;g5988.t1;g6548.t1;g2786.t1;g969.t1;g1713.t1;g3300.t1;g6188.t1;g4235.t1;g2030.t1;g1539.t1;g5643.t1;g2517.t1;g481.t1;g3747.t1;g4520.t1;g1690.t1;g6826.t1;g6858.t1;g8085.t1;g2641.t1;g7708.t1;g5671.t1;g7173.t1;g656.t1;g5807.t1;g4693.t1;g8568.t1;g2646.t1…
V	Defense mechanisms	54	g692.t1;g5700.t1;g3251.t1;g5614.t1;g2353.t1;g4261.t1;g3535.t1;g8358.t1;g4352.t1;g5680.t1;g4266.t1;g5.t1;g4248.t1;g5641.t1;g5628.t1;g300.t1;g5369.t1;g6117.t1;g3383.t1;g3074.t1;g3775.t1;g7138.t1;g2326.t1;g1525.t1;g669.t1;g1644.t1;g1046.t1;g5011.t1;g3760.t1;g7120.t1;g7340.t1;g7088.t1;g1973.t1;g4300.t1;g448.t1;g4636.t1;g4536.t1;g5270.t1;g7126.t1;g1296.t1;g3086.t1;g8292.t1;g1592.t1;g1870.t1;g167.t1;g9…
S	Function unknown	493	g4812.t1;g1767.t1;g1647.t1;g4308.t1;g274.t1;g746.t1;g3427.t1;g1989.t1;g8310.t1;g4434.t1;g7007.t1;g7728.t1;g5275.t1;g7897.t1;g5380.t1;g5232.t1;g7000.t1;g902.t1;g2800.t1;g4652.t1;g3409.t1;g4482.t1;g253.t1;g2410.t1;g8252.t1;g7210.t1;g715.t1;g5310.t1;g2069.t1;g8998.t1;g3210.t1;g8338.t1;g8777.t1;g4616.t1;g3579.t1;g716.t1;g2694.t1;g4733.t1;g3546.t1;g2042.t1;g6192.t1;g2471.t1;g665.t1;g1572.t1;g7605.t1;g…
T	Signal transduction mechanisms	469	g7122.t1;g1956.t1;g1425.t1;g3207.t1;g1512.t1;g2195.t1;g6521.t1;g3032.t1;g518.t1;g8936.t1;g7313.t1;g5331.t1;g5146.t1;g1519.t1;g330.t1;g5956.t1;g6039.t1;g5087.t1;g1482.t1;g4358.t1;g1130.t1;g7695.t1;g8427.t1;g2960.t1;g8073.t1;g3449.t1;g3606.t1;g380.t1;g5352.t1;g8.t1;g2631.t1;g5674.t1;g132.t1;g137.t1;g406.t1;g6776.t1;g550.t1;g6856.t1;g524.t1;g7560.t1;g7857.t1;g4135.t1;g7594.t1;g8133.t1;g6604.t1;g3089…
